# Supplementary material for: Transport phenomena of TiCoSb: defect induced modification in the structure and density of states
Source: Royal Society of Chemistry journal article supplement (doi:10.1039/d3ma00323j), 2023-01-01
Supplement: d3ma00323j1.pdf [file d3ma00323j1.pdf]

## Supplemental material for “Transport phenomena of TiCoSb: Defects induced modification in structure and density of states”

S. Mahakal<sup>1</sup>, Diptasikha Das<sup>2</sup>, Pintu Singha<sup>3</sup>, Aritra Banerjee<sup>3</sup>, S. C. Das<sup>4</sup>,  
Santanu K. Maiti<sup>5</sup>, S. Assa Aravindh<sup>6</sup> and K. Malik\*<sup>1</sup>

<sup>1</sup>Department of Physics, Vidyasagar Metropolitan College, Kolkata-700006, India.

<sup>2</sup>Department of Physics, ADAMAS University, Kolkata-700126, India.

<sup>3</sup>Department of Physics, University of Calcutta, Kolkata-700009, India.

<sup>4</sup>Department of Physics, Tamkang University, New Taipei City-251301, Taiwan.

<sup>5</sup>Physics and Applied Mathematics Unit, Indian Statistical Institute, 203 Barrackpore Trunk Road, Kolkata-700 108, India.

<sup>6</sup>Nano and Molecular Systems Research Unit (NANOMO), University of Oulu, FIN-90014, Finland.

**FIGURE S1:** (Color online). X-ray diffraction patterns after Rietveld refinement and the corresponding refinement parameters have been obtained, using FullProf software for TiCoSb<sub>1+x</sub> ( $x = 0.00, 0.01, 0.02, 0.03, 0.04, 0.06$ ) samples at room temperature.

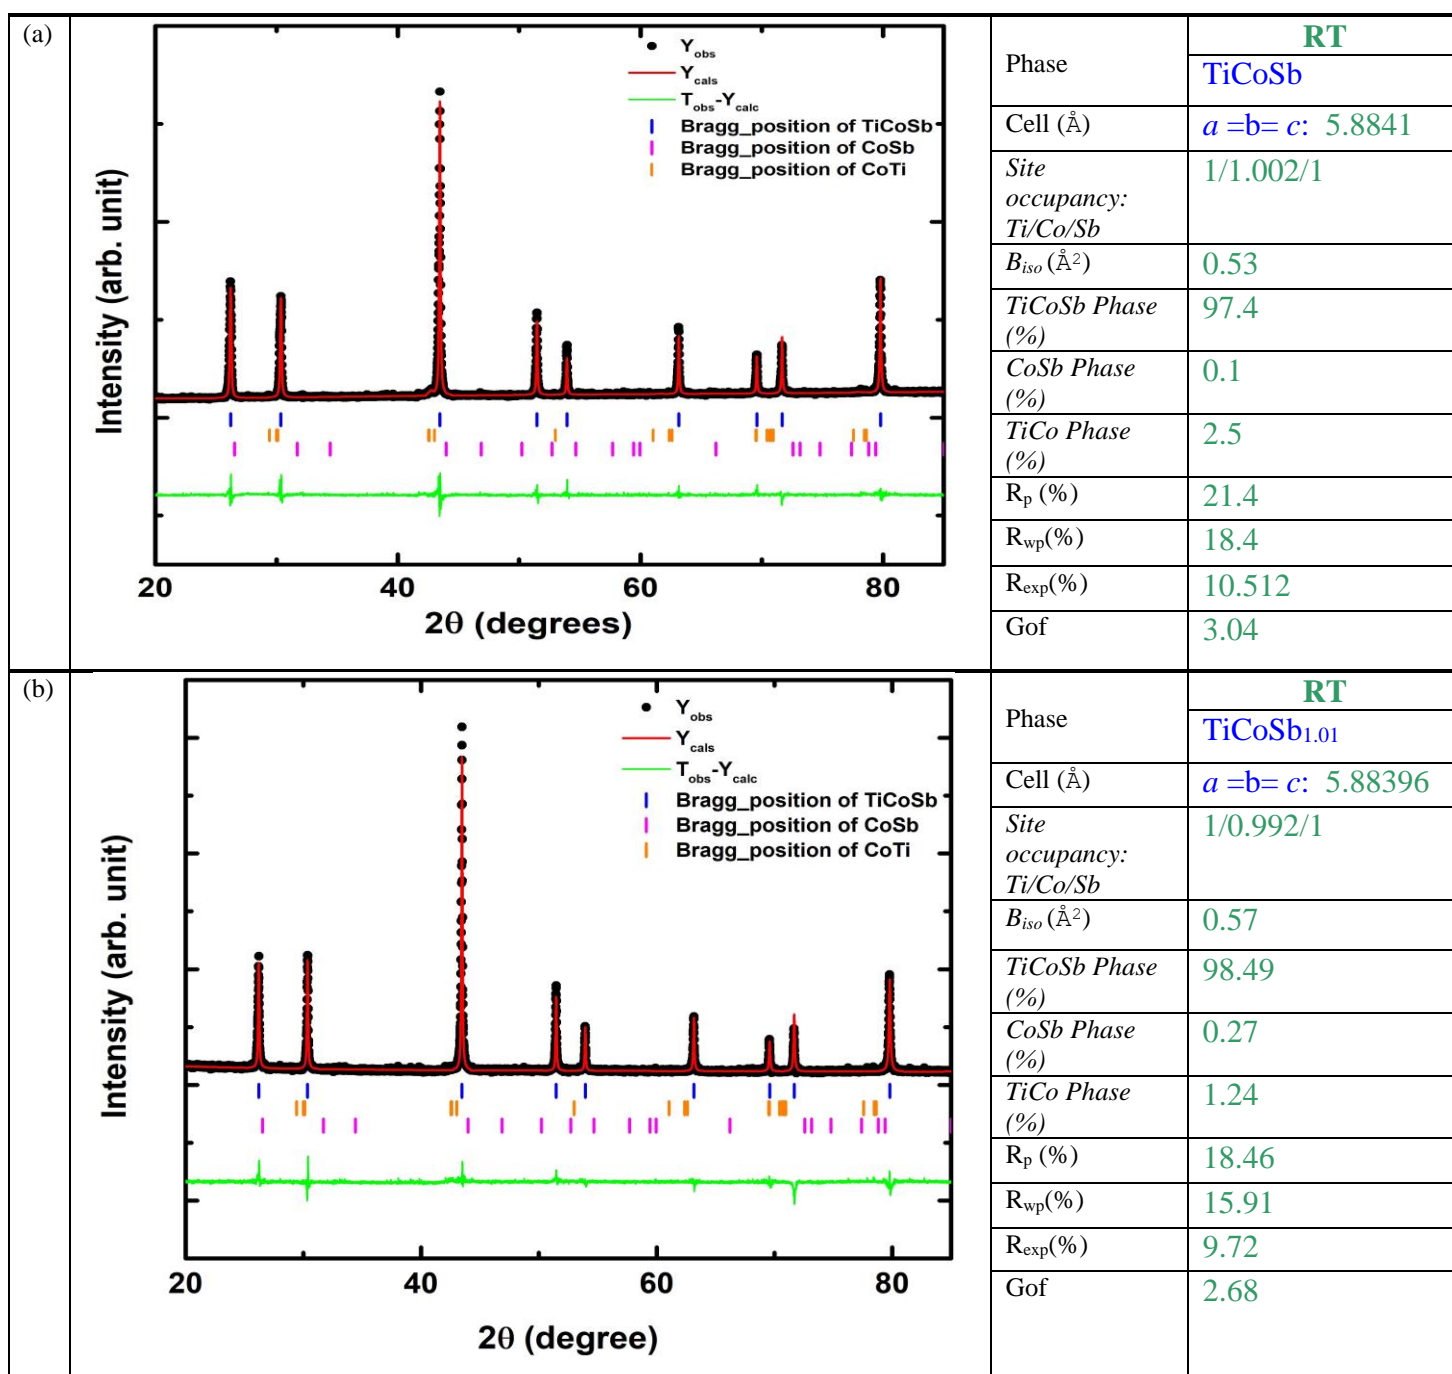

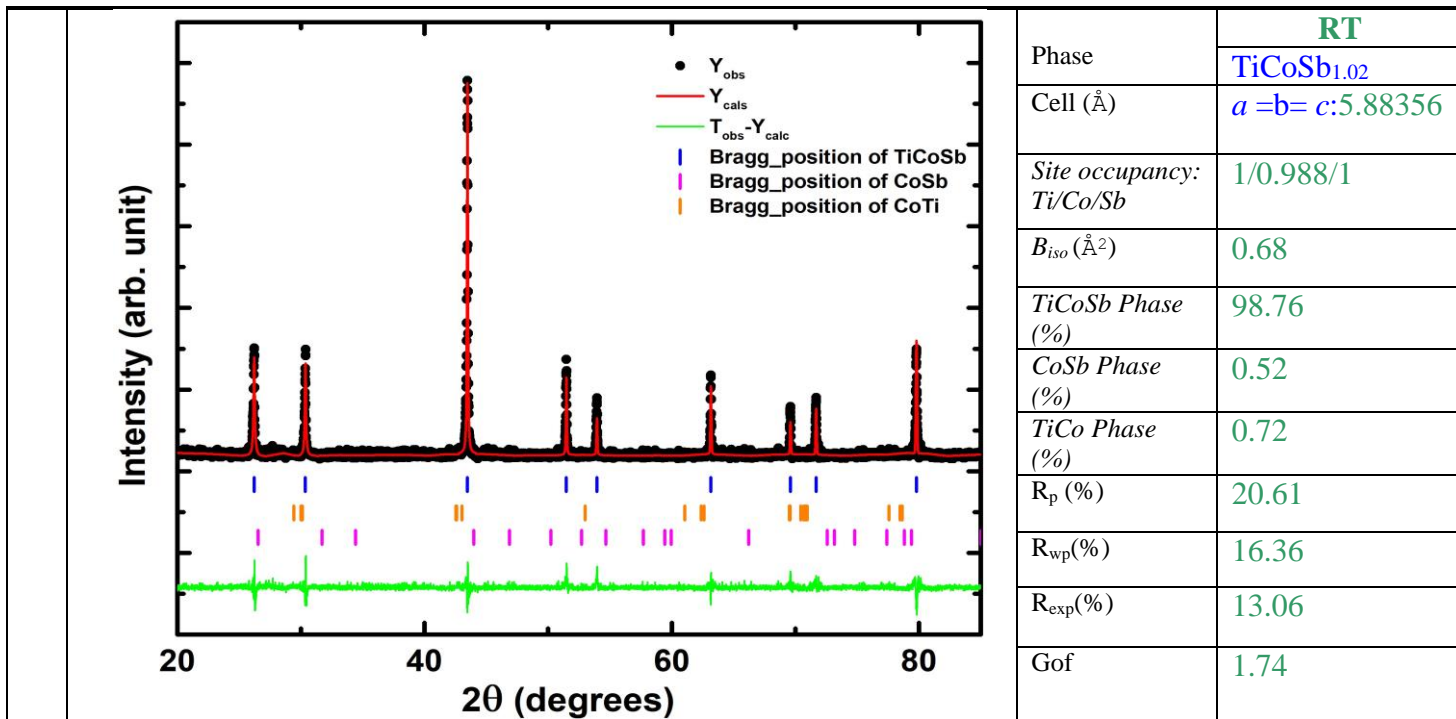

|                             |                              |
|-----------------------------|------------------------------|
| Phase                       | RT<br>TiCoSb <sub>1.02</sub> |
| Cell (Å)                    | $a = b = c: 5.88356$         |
| Site occupancy:<br>Ti/Co/Sb | 1/0.988/1                    |
| $B_{iso}$ (Å <sup>2</sup> ) | 0.68                         |
| TiCoSb Phase (%)            | 98.76                        |
| CoSb Phase (%)              | 0.52                         |
| TiCo Phase (%)              | 0.72                         |
| $R_p$ (%)                   | 20.61                        |
| $R_{wp}$ (%)                | 16.36                        |
| $R_{exp}$ (%)               | 13.06                        |
| Gof                         | 1.74                         |

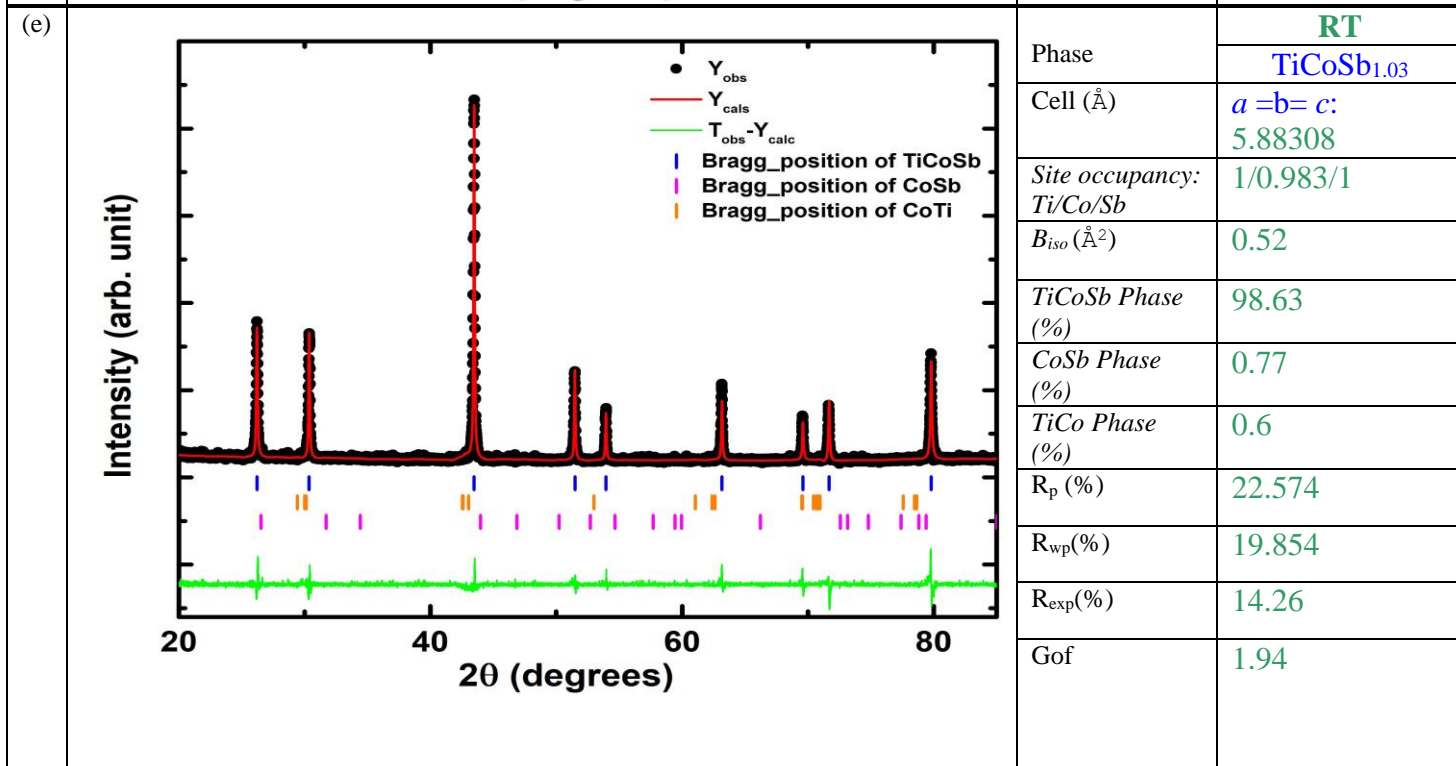

|                             |                              |
|-----------------------------|------------------------------|
| Phase                       | RT<br>TiCoSb <sub>1.03</sub> |
| Cell (Å)                    | $a = b = c: 5.88308$         |
| Site occupancy:<br>Ti/Co/Sb | 1/0.983/1                    |
| $B_{iso}$ (Å <sup>2</sup> ) | 0.52                         |
| TiCoSb Phase (%)            | 98.63                        |
| CoSb Phase (%)              | 0.77                         |
| TiCo Phase (%)              | 0.6                          |
| $R_p$ (%)                   | 22.574                       |
| $R_{wp}$ (%)                | 19.854                       |
| $R_{exp}$ (%)               | 14.26                        |
| Gof                         | 1.94                         |

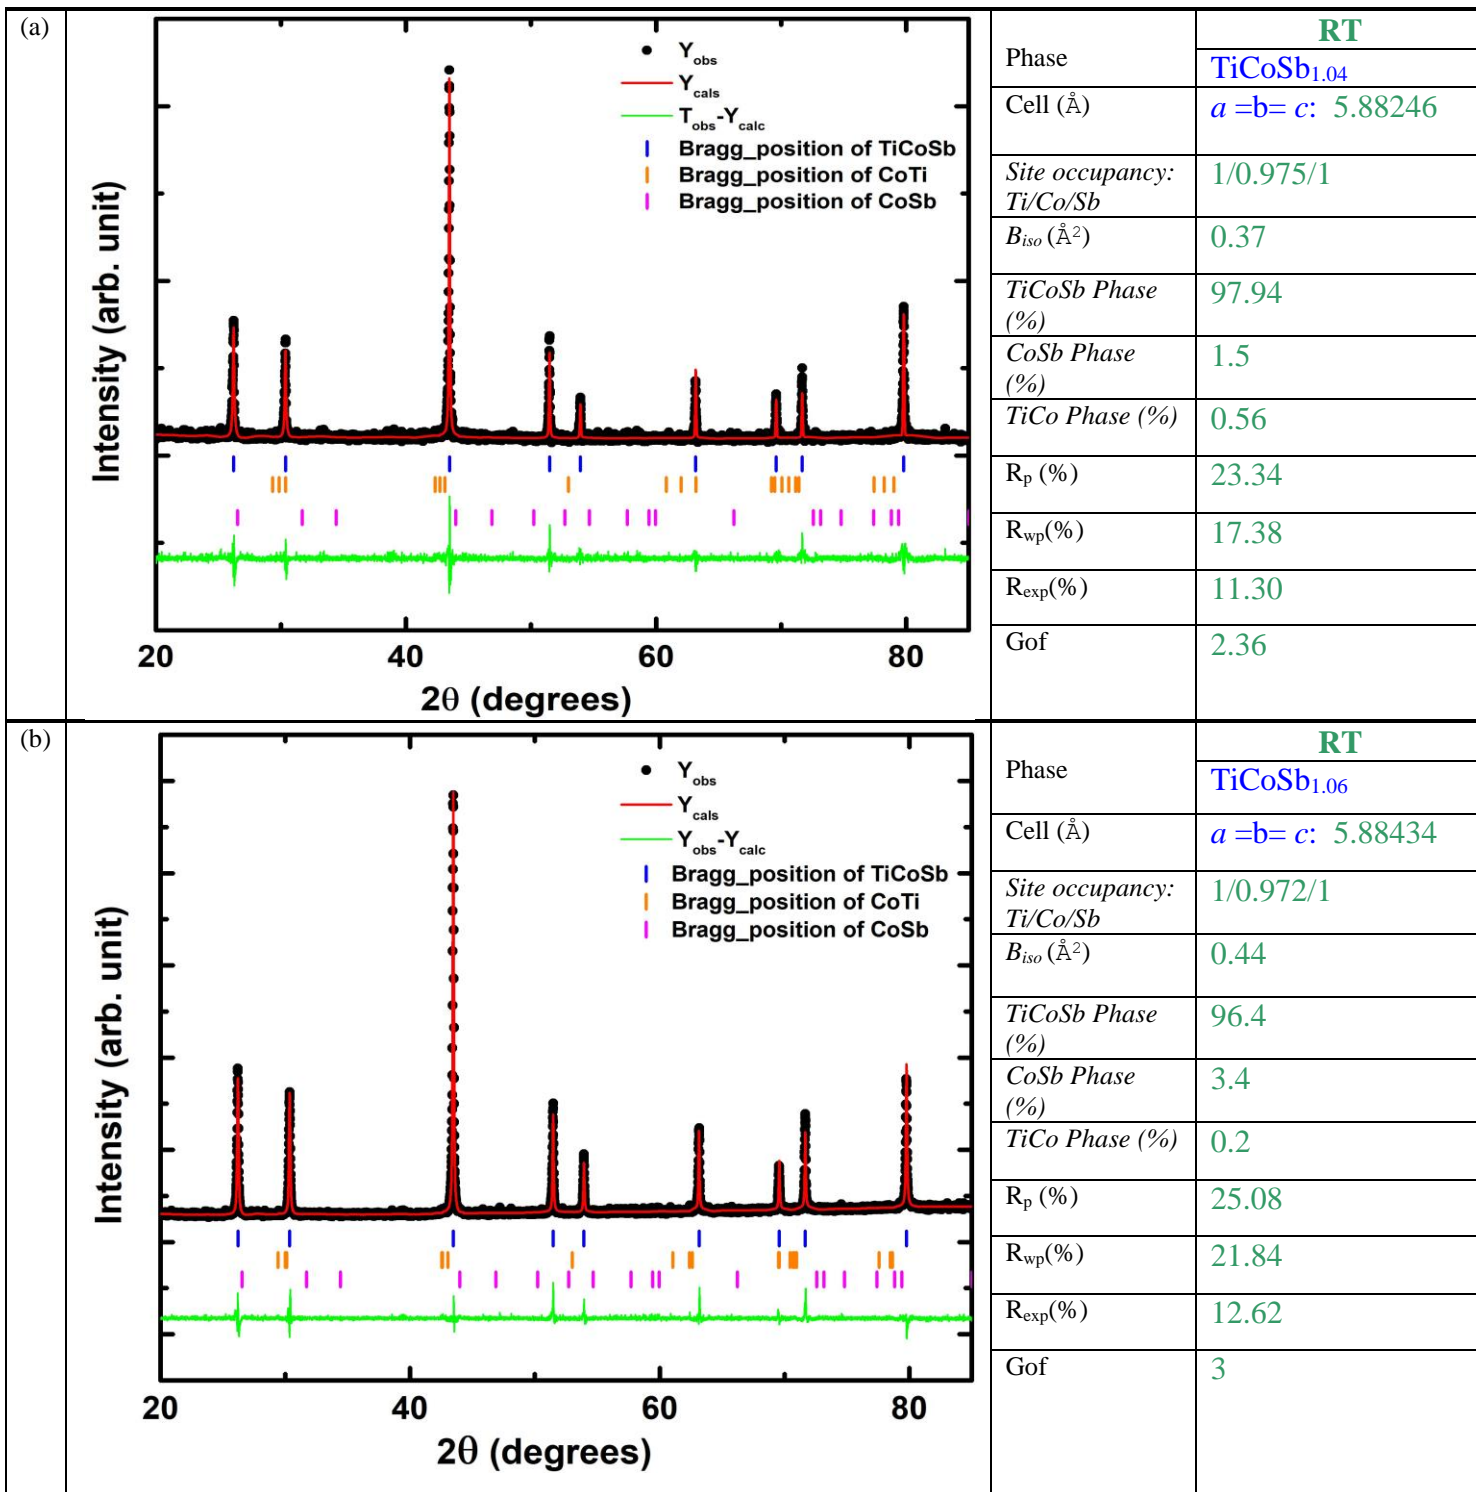

**FIGURE S2:** (Color online). Williamson-Hall plot of polycrystalline  $\text{TiCoSb}_{1+x}$  ( $x=0.0, 0.01, 0.02, 0.03, 0.04, 0.06$ ) HH materials. Solid line represents best linear fit.

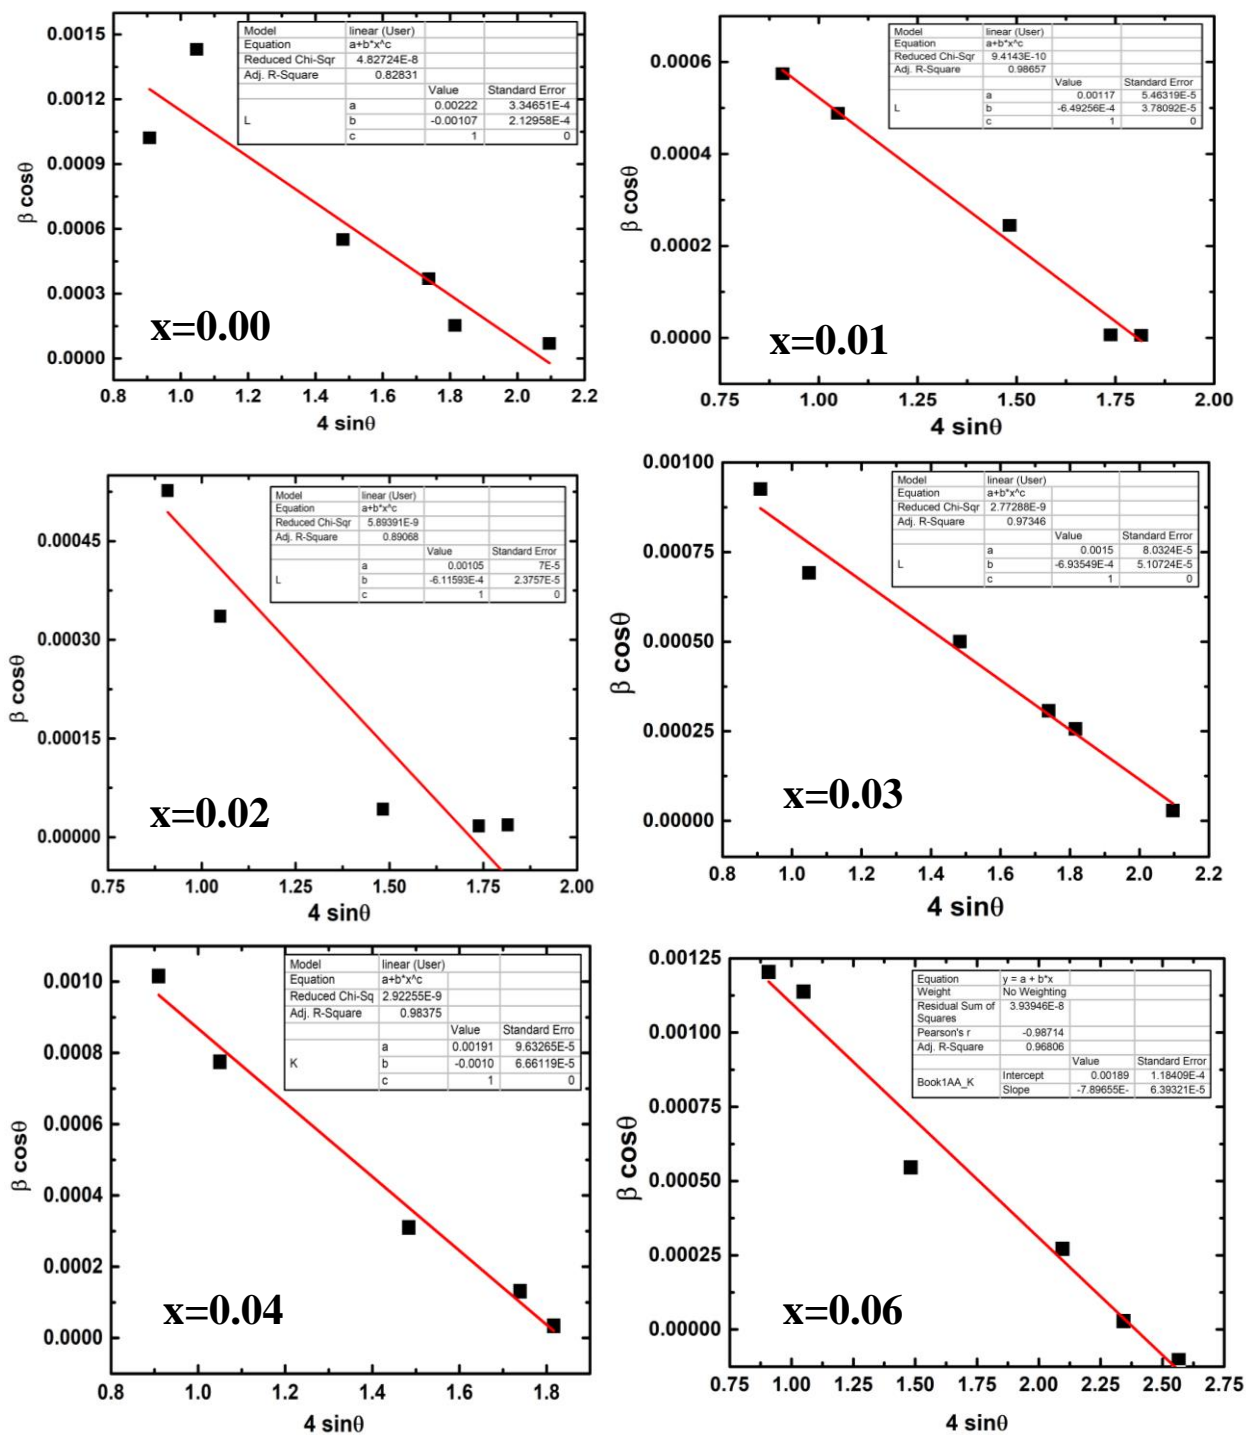

## Calculation of Dislocation density ( $N_D$ ) using modified Williamson-Hall plot:

Dislocation density ( $N_D$ ) of the samples has been obtained using the following equation:

$$\Delta K = \frac{0.9}{d} + \frac{\pi A^2 B_D^2}{2} N_D^{1/2} K^2 C \pm O(K^4 C^2)$$

$$C = \text{Average dislocation contrast factor} = C_{h00} \frac{1 - q(h^2 k^2 + k^2 l^2 + h^2 l^2)}{(h^2 + k^2 + l^2)^2}.$$

$h, k, l$  : Indices of crystal plane

$C_{h00}$  : Average dislocation contrast factor corresponding to the  $h00$  reflection.

$q$  : Constant parameter = -2.7 [1]

$A$  : Parameter related to the effective outer cut-off radius of dislocations

$B_D$  : Burgers vector

$d$  : Average crystallite size

It is assumed that the parameters  $q$ ,  $A$  and  $B_D$  do not change significantly for samples  $\text{TiCoSb}_{1+x}$  ( $x=0, 0.01, 0.02, 0.03, 0.04, 0.06$ ). Here, we have estimated relative dislocation densities  $N_D/N_{D|x=0}$  to avoid the constant terms.

$$\left( \frac{N_D}{N_{D|x=0}} \right) = \left( \frac{m_x}{m_{x=0}} \right)^2.$$

Where  $m_x$  is the slope ' $\Delta K$  versus  $K^2 C$ ' curve, estimated for each sample  $\text{TiCoSb}_{1+x}$  ( $x=0.0, 0.01, 0.02, 0.3, 0.04, 0.06$ ). And  $m_{x=0}$  represents the slope of ' $\Delta K$  versus  $K^2 C$ ' curve for  $x = 0$ .

**FIGURE S3:** (Color online). Modified Williamson-Hall plot of polycrystalline  $\text{TiCoSb}_{1+x}$  ( $x=0.0, 0.01, 0.02, 0.03, 0.04, 0.06$ ) HH materials. Solid line represents best linear fit.

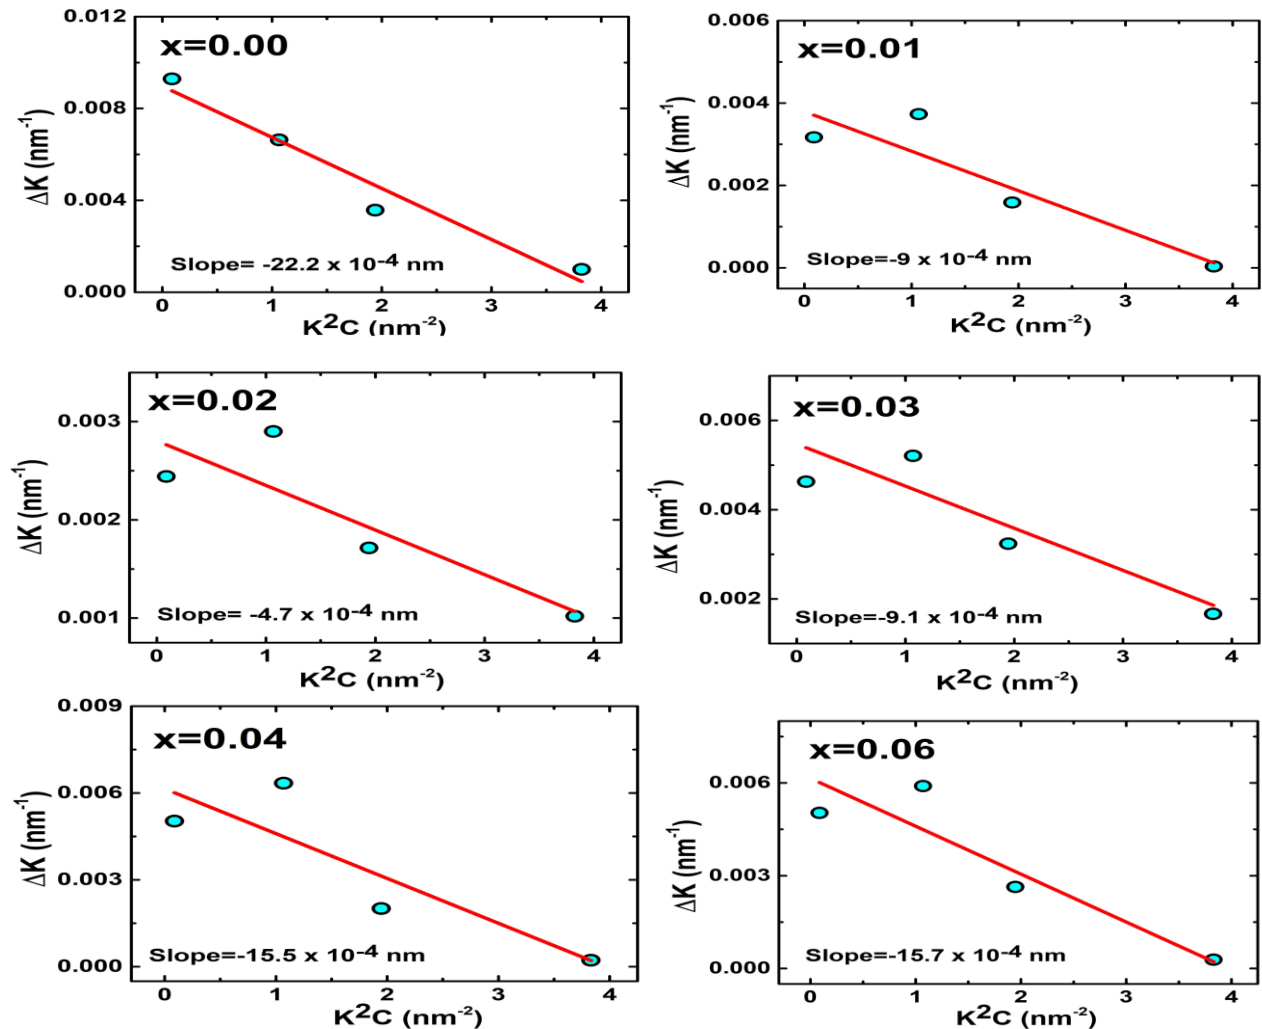

**FIGURE S4: (Color online).** Variation of PF with temperature of polycrystalline  $\text{TiCoSb}_{1+x}$  ( $x=0.0, 0.01, 0.02, 0.03, 0.04, 0.06$ ) HH materials. Inset depicts Sb concentration dependent PF at room temperature (300 K).

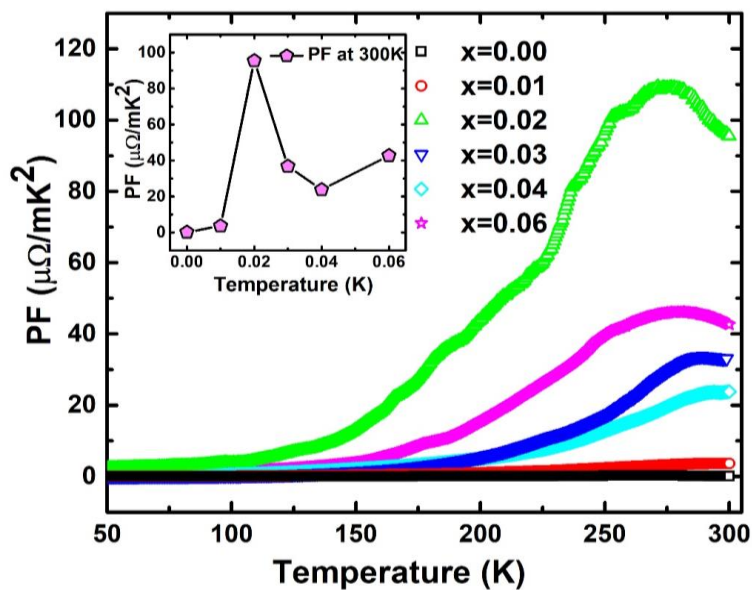

**Reference:**

- [1] T. Ungár, S. Ott, P. G. Sanders, A. Borbély, and J. R. Weertman, *Acta Mater.* **46**, 3693 (1998).
